# Supplementary material for: Single-cell transcriptomic profiles in the pathophysiology within the microenvironment of early diabetic kidney disease
Source: PubMed Central journal article supplement (PMC10352247; doi:10.1038/s41419-023-05947-1), 2023-07-17

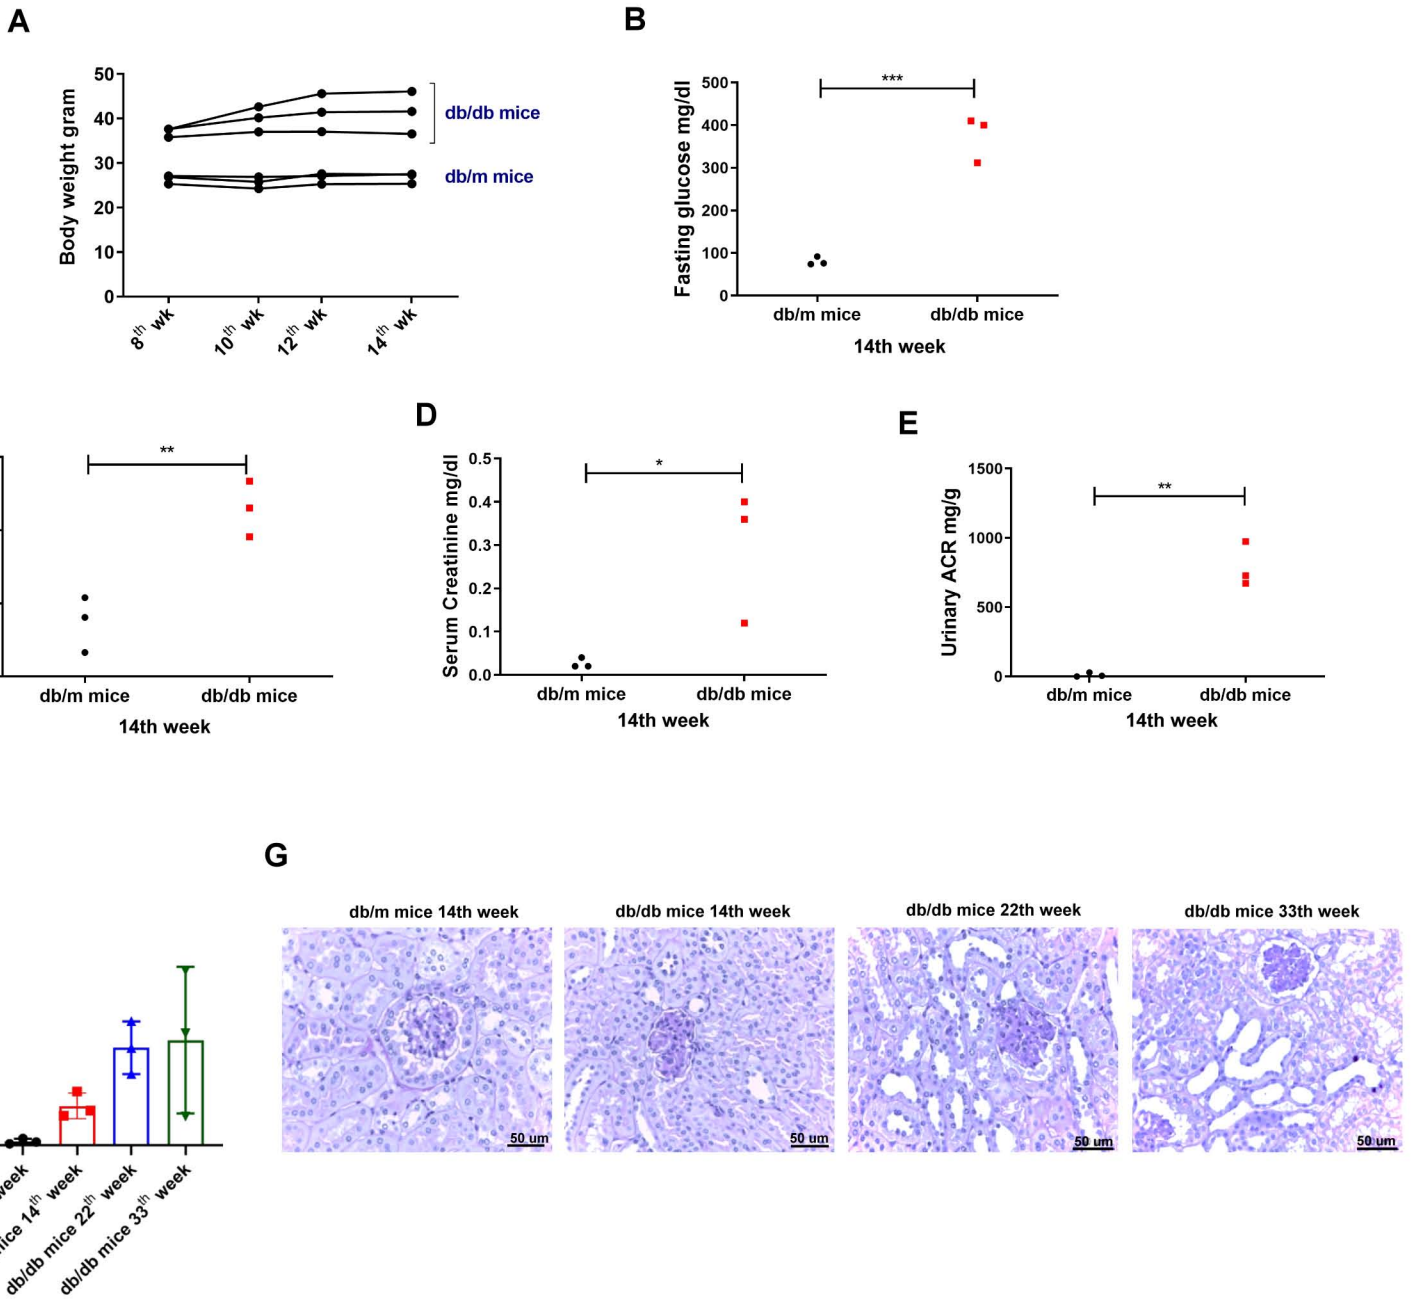

**A**

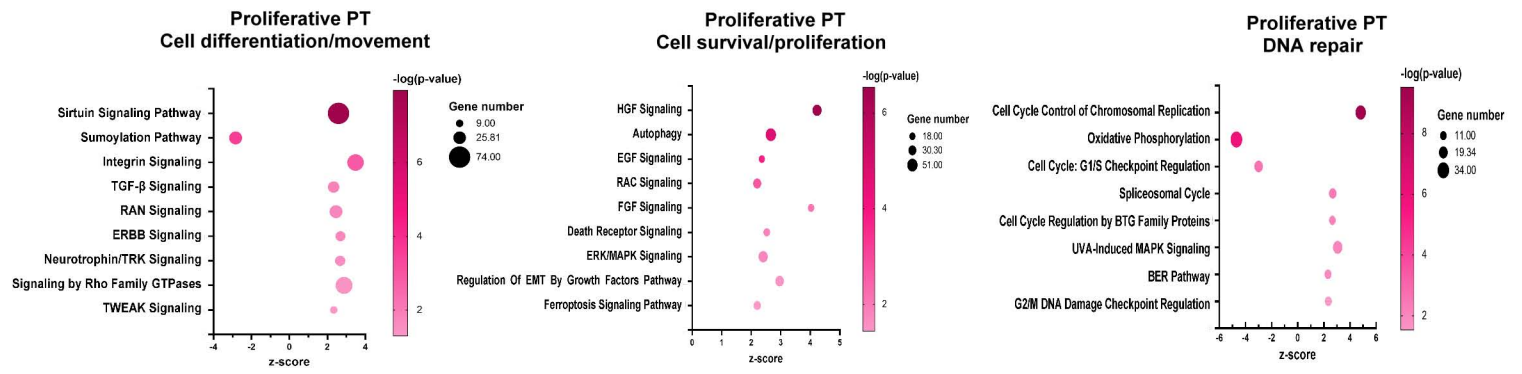

**B**

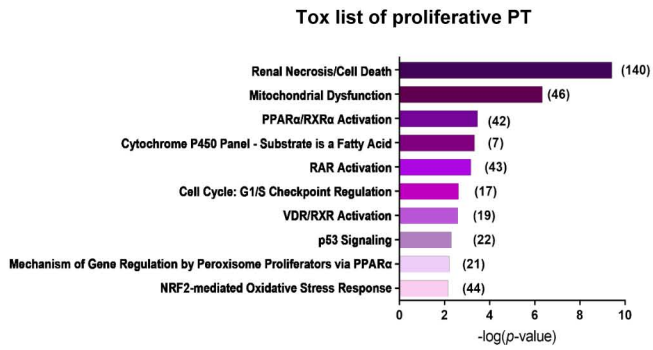

**Fig S2**

**A****Tox list of M1**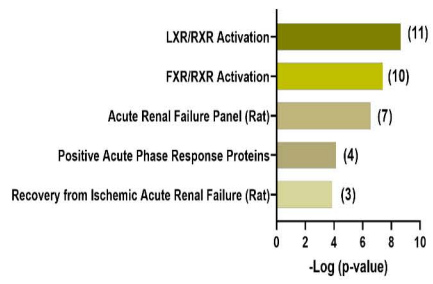**B****Tox list of M6**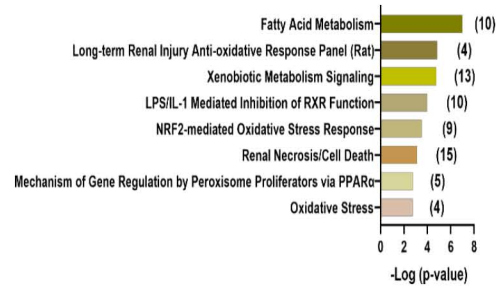

**A****KEGG pathway of M1**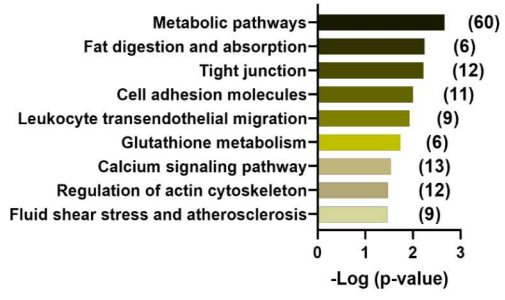**B**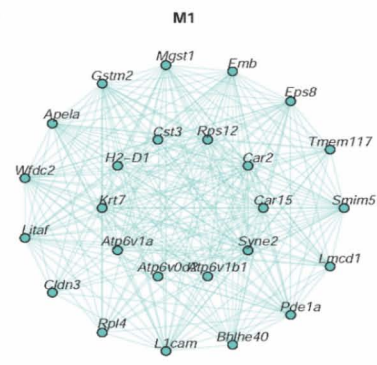**C**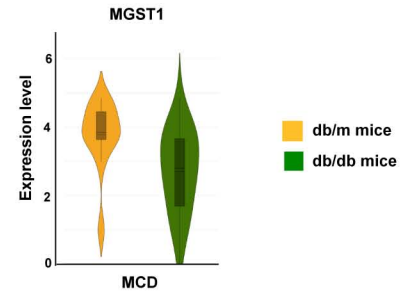

**A**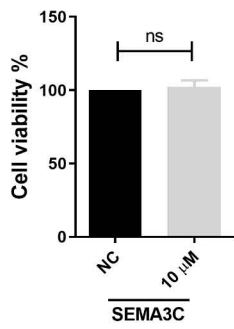**B**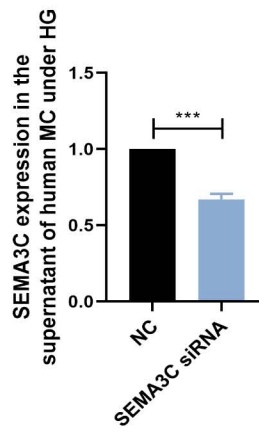**C**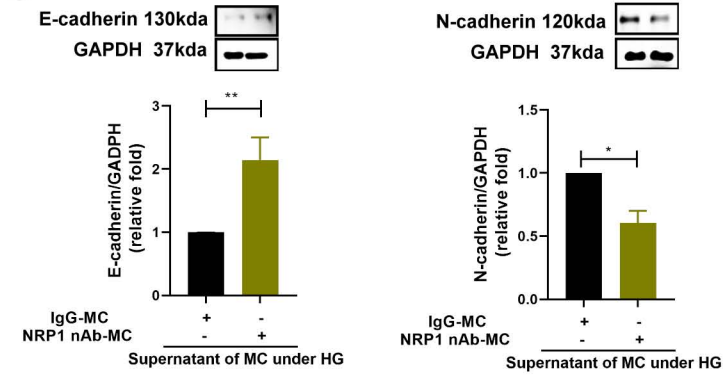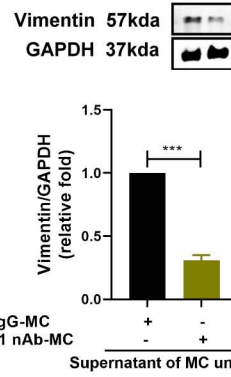**D**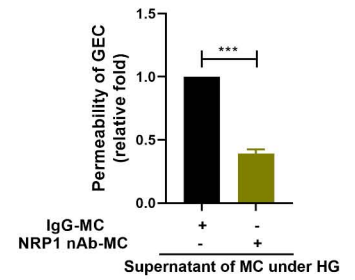**E**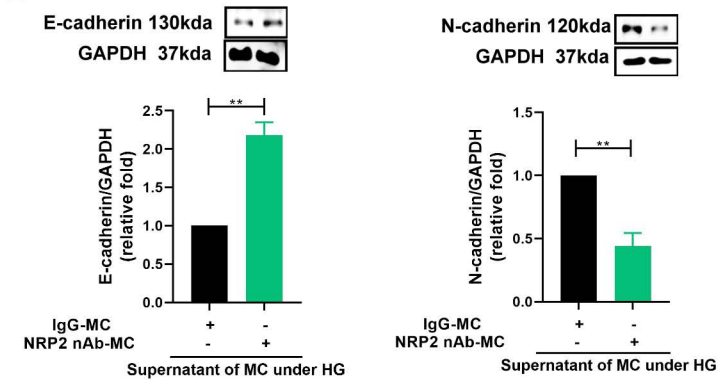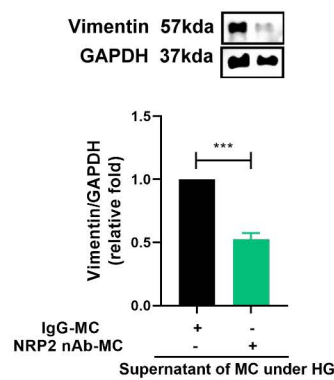**F**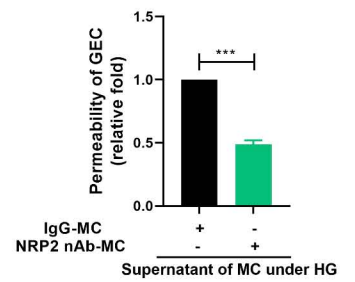**G**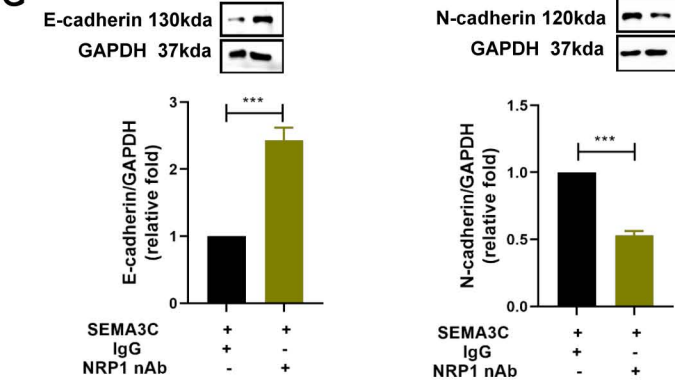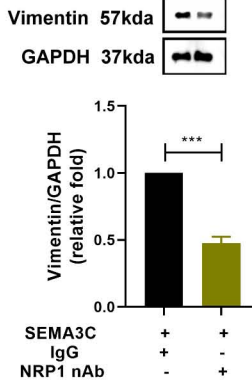**H**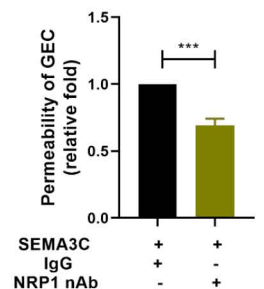**I**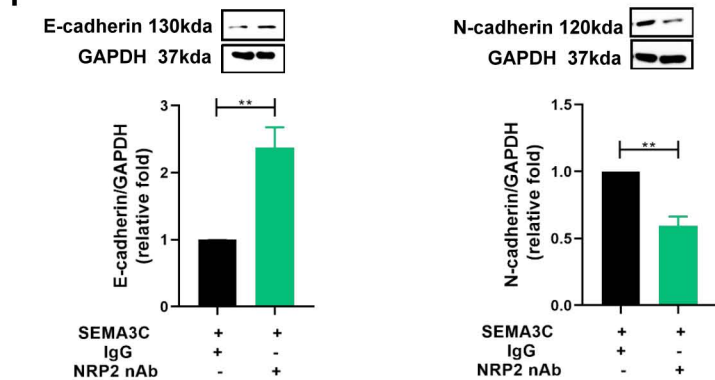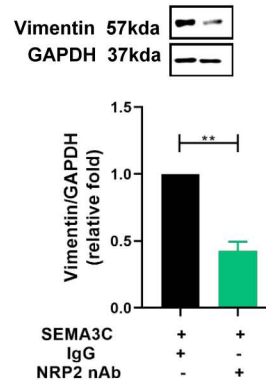**J**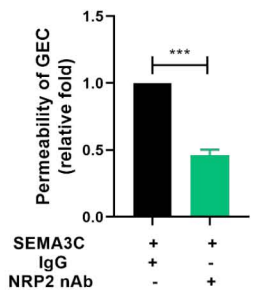

Supplement: 41419_2023_5947_MOESM1_ESM.pdf [file 41419_2023_5947_MOESM1_ESM.pdf]
